# Supplementary material for: Luzp4 defines a new mRNA export pathway in cancer cells
Source: PubMed Central journal article supplement (PMC4344508; doi:10.1093/nar/gkv070), 2015-02-06
Supplement: supp_gkv070_nar-03290-a-2014-File010.pdf [file supp_gkv070_nar-03290-a-2014-File010.pdf]

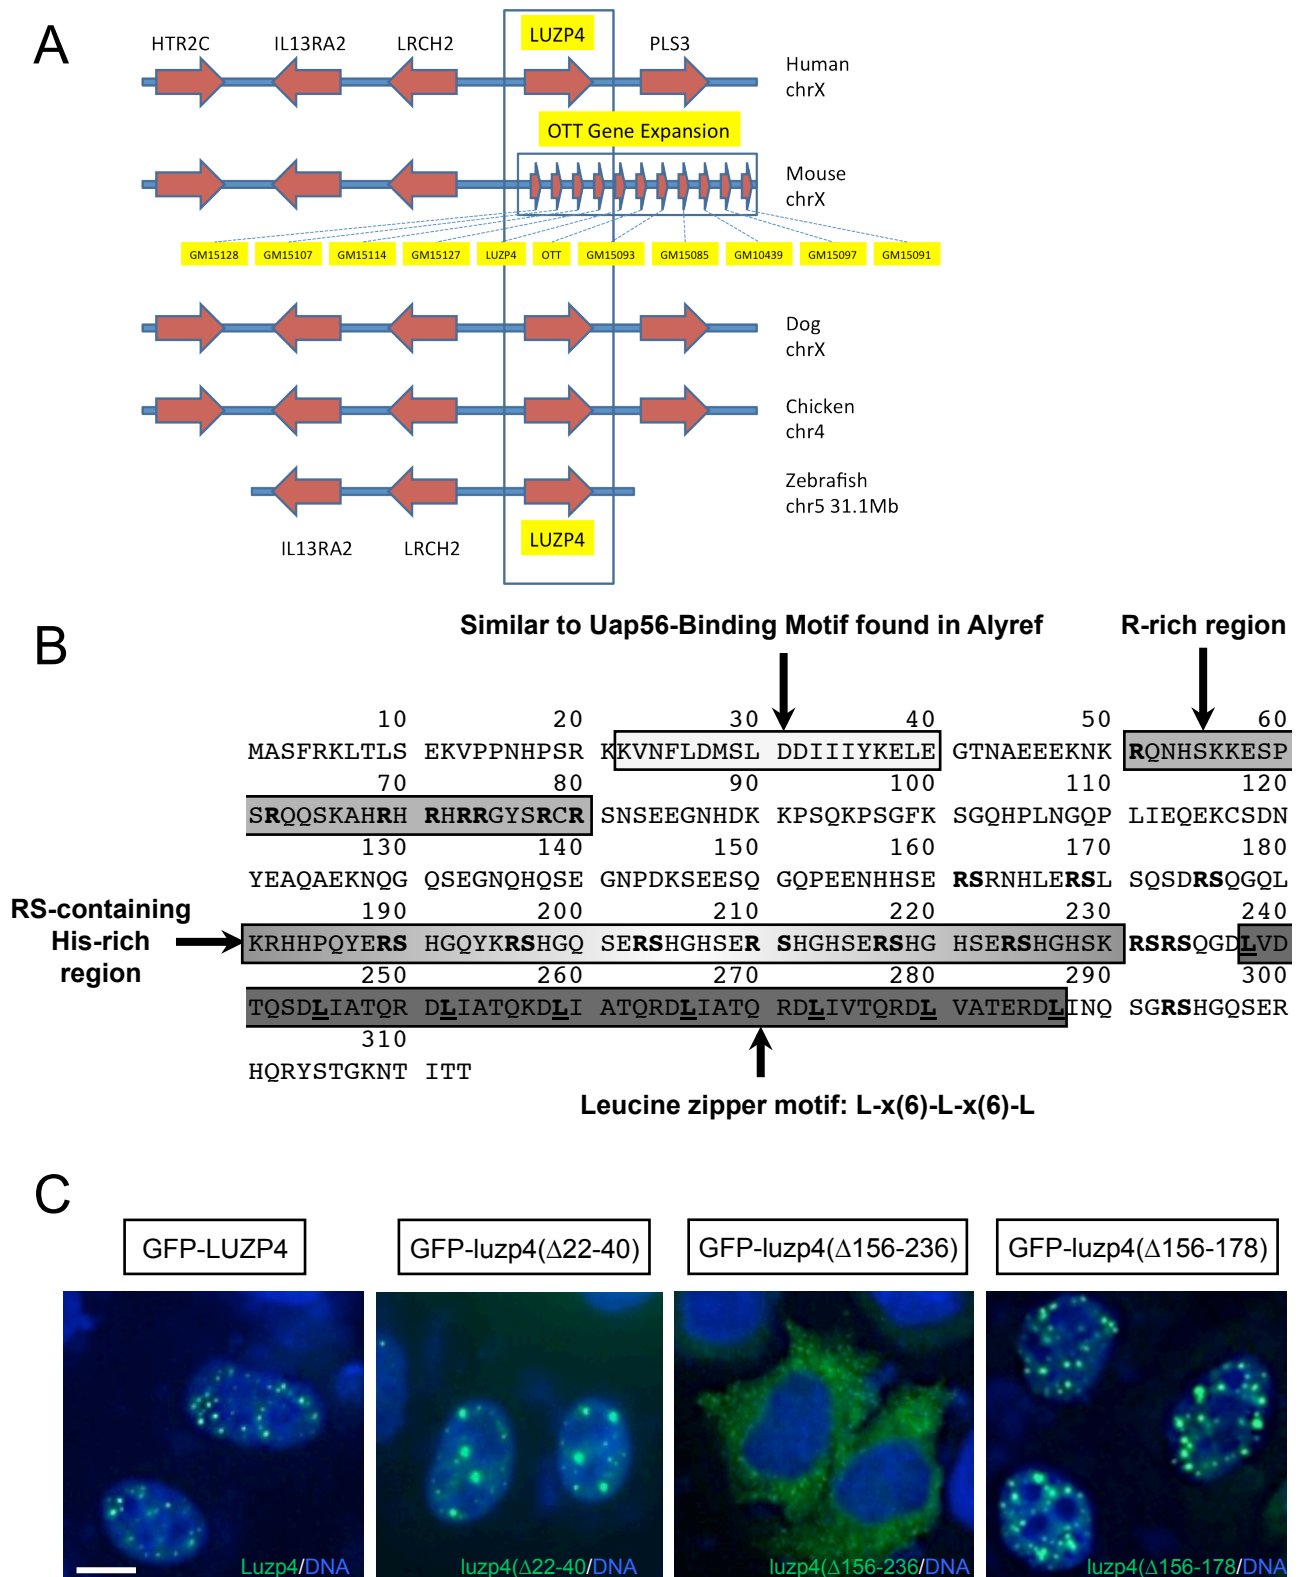

**Supplementary Figure S1. Bioinformatic analysis on Luzp4 and mapping of Luzp4 NLS. (A)** Syntenic analysis of LUZP4 in vertebrates. LUZP4 genes are expanded in the mouse genome and include the paralogue OTT. **(B)** Amino acid sequence of Luzp4 with key motifs highlighted. **(C)** The UBM-like motif (aa 22-40) is important for Luzp4 nuclear distribution and the NLS of Luzp4 lies within the RS-containing His-rich (RS-H) region. Fluorescence images of the indicated GFP fusions expressed in HeLa cells. The scale bar corresponds to 10  $\mu$ m.

**A**

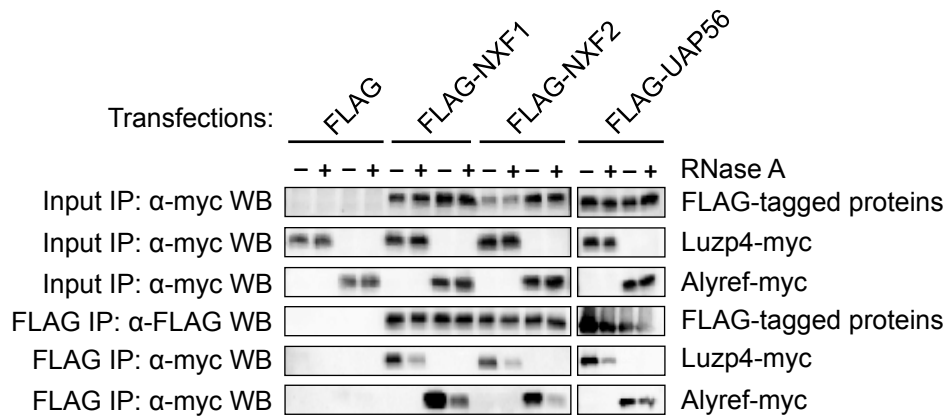

**B**

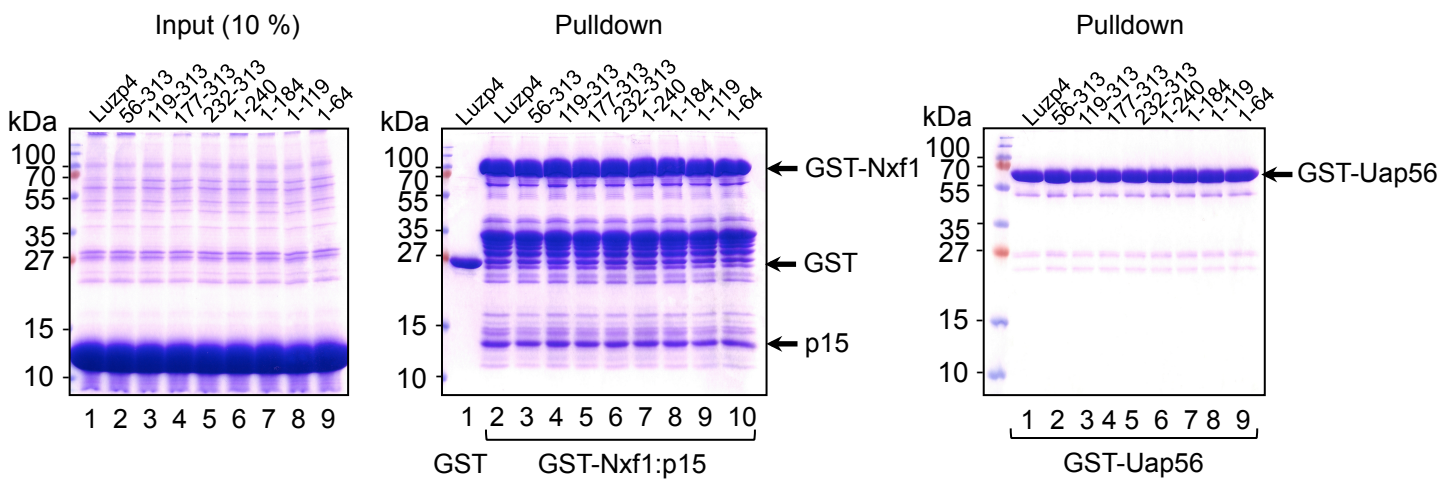

**Supplementary Figure S2. Interaction of Luzp4 with other mRNA export factors.**

(A) Co-IP analysis of the indicated FLAG tagged cDNAs with Myc tagged Luzp4 and Alyref. Anti-FLAG antibody was used for the Co-IP and Western blots were probed with the antibodies indicated on the left hand side. Inputs were 7.5 %.

(B) Coomassie gels of the GST-pulldowns presented in Figure 1D. GST-pulldown analysis of <sup>35</sup>S labelled Luzp4 truncations as indicated with either GST-Nxf1:p15 (central panel) or GST-Uap56 (right panel). The <sup>35</sup>S labelled protein inputs are shown in the left panel.

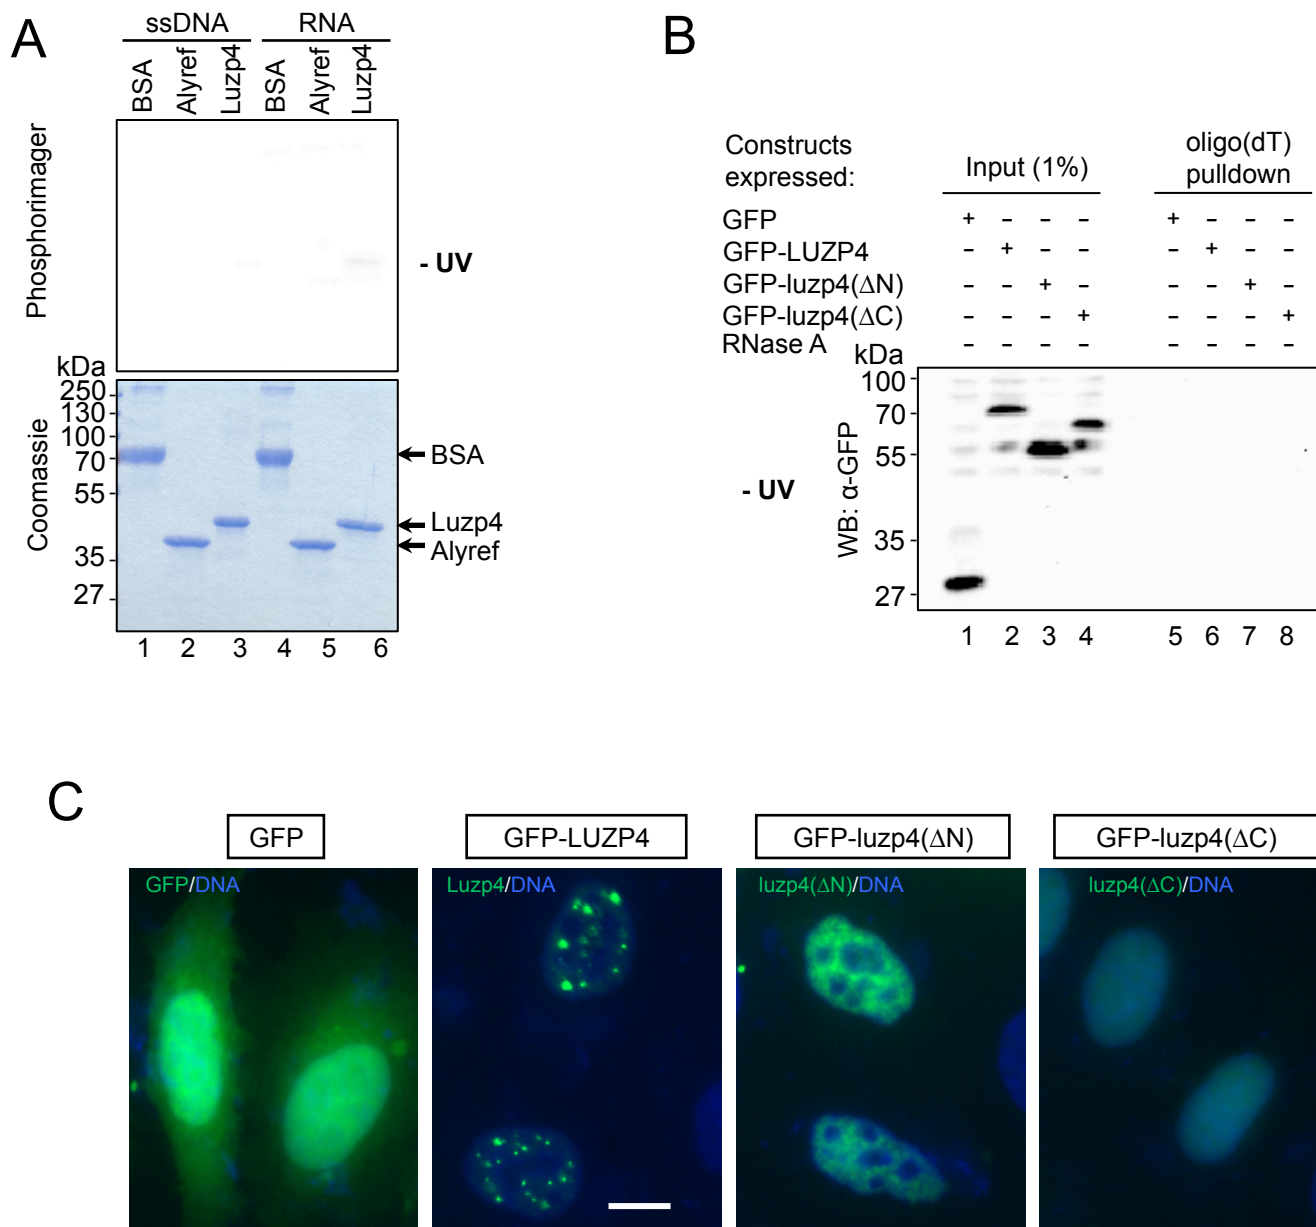

### Supplementary Figure S3. RNA binding activity of Luzp4.

**(A)** Panels relevant to Figure 2A. *In vitro* RNA binding experiment where UV irradiation was omitted. The indicated phosphorimage was acquired at the same time as in Figure 2A.

**(B)** mRNP capture assays of Luzp4 mutants. Panel relevant to Figure 2D. UV irradiation was here omitted. Proteins were visualised by Western blot with anti-GFP antibody. The image was acquired at the same time as Figure 2D.

**(C)** Subcellular localisation of GFP-Luzp4 and truncations transiently expressed in HeLa cells. The scale bar corresponds to 10  $\mu$ m.

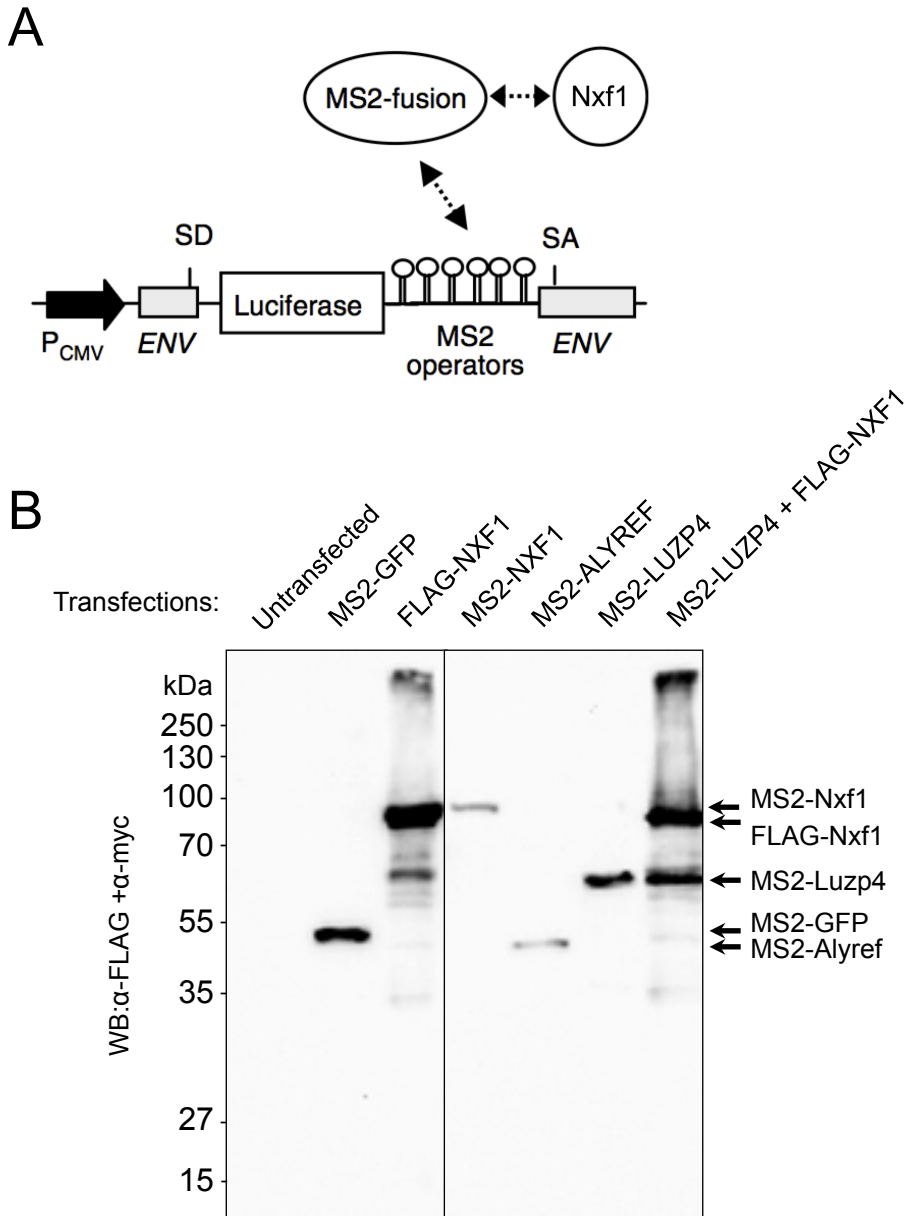

**Supplementary Figure S4. Tethered mRNA export assay.**

**(A)** Schematic of the tethered mRNA export assay. The luciferase reporter gene is sited within an inefficiently spliced intron derived from HIV-1. When an mRNA export factor is tethered to the reporter mRNA it overcomes nuclear retention and the exported pre-mRNA leads to luciferase production.

**(B)** Western blot analysis was performed on 5  $\mu$ g of protein extracts to confirm expression of the MS2 fusions used in Figure 3C. The membrane was probed with anti-FLAG (Sigma<sup>®</sup>) and anti-myc (Roche<sup>®</sup>) antibodies.



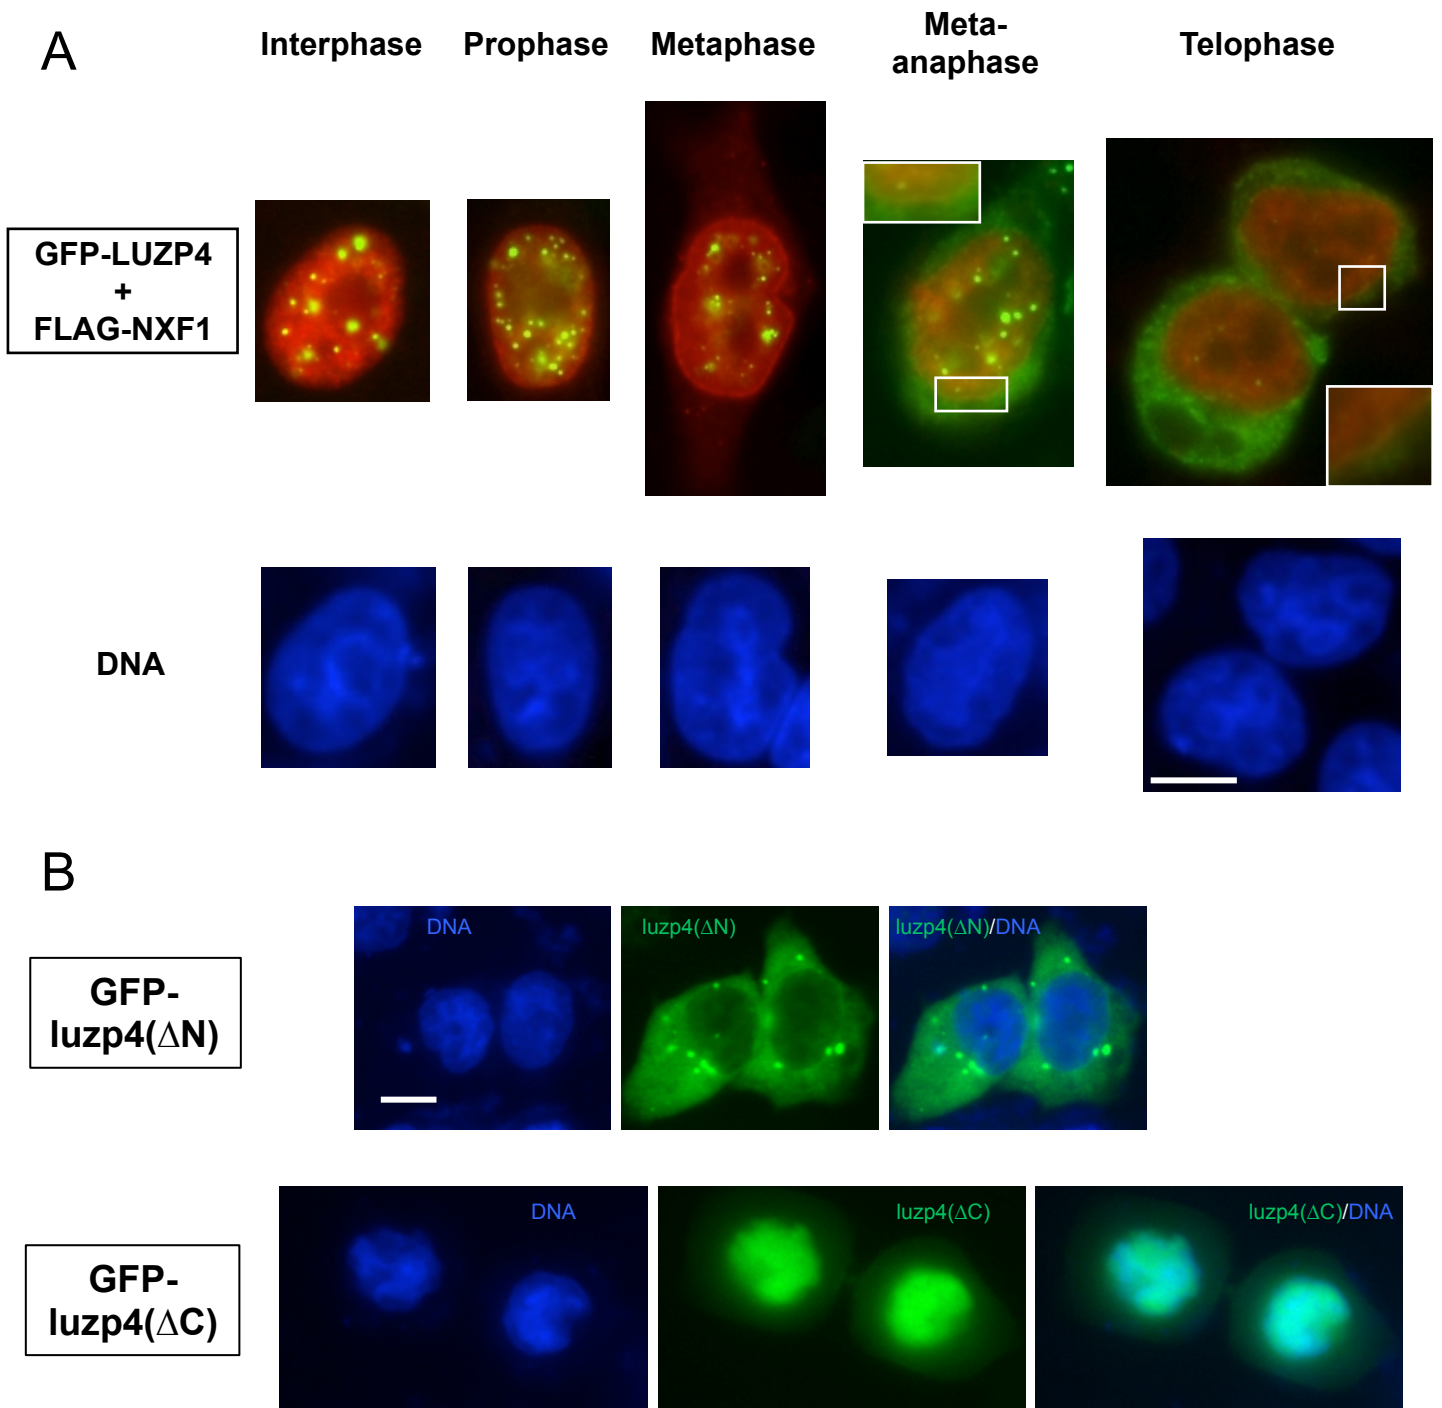

**Supplementary Figure S5. Luzp4 relocates to the cytoplasm in newly divided cells.**

(A) During cell division, Luzp4 is relocalised to the cytoplasm and is unable to trigger a depletion of Nxf1's staining from the nuclear rim. GFP-LUZP4 and FLAG-NXF1 were transiently expressed in HeLa cells (B) This relocalisation phenomenon requires the leucine-zipper domain of Luzp4. In its absence, the majority of luzp4( $\Delta$ C) mutant proteins stays in the nucleus. The indicated GFP fusions were transiently transfected in HeLa cells. The scale bars correspond to 10  $\mu$ m.

A

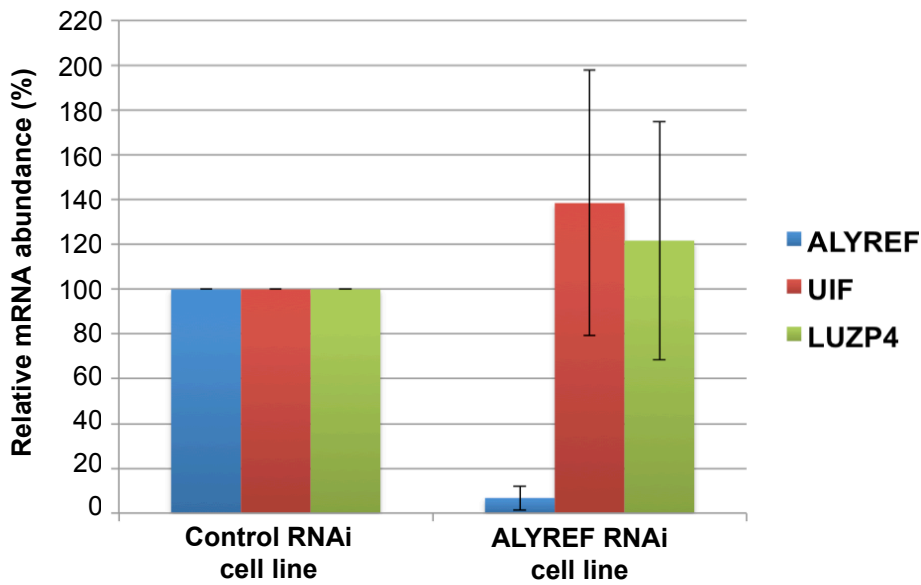

B

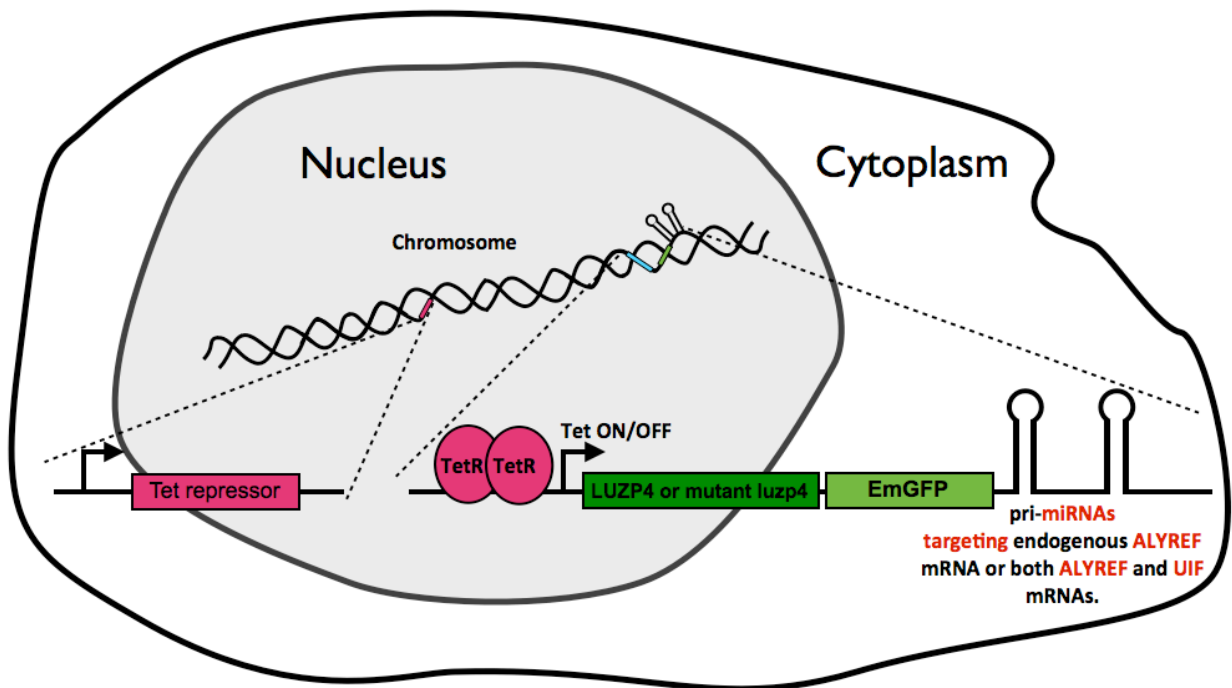

**Supplementary Figure S6. Luzp4 complementation system.**

(A) qRT-PCR analysis on the mRNA levels for the indicated genes in Flp-In™ T-REx™ 293 Control RNAi or Alyref RNAi stable cell lines.

(B) Schematic of the complementation system used to knockdown endogenous mRNA export adaptors by RNAi and to simultaneously express wild-type or mutant forms of Luzp4 in a Flp-In™ T-REx™ 293 cellular background.

## Supplementary data 7. Relative expression of ALYREF, UIF and LUZP4 in cancerous tissues.

qRT-PCR was used to evaluate the abundance of ALYREF, UIF, and LUZP4 at the RNA level using commercially purchased cDNA array plates from *Origene*. The graphs show delta CT values for each gene normalised to the U1 snRNA content for each cDNA taken from cancer tissues from a catalogue of patients. Wells can be cross-referenced to the Origene datasheet (Supplementary Table S2), 'P' stands for 'plate' and the following letter gives the well number.

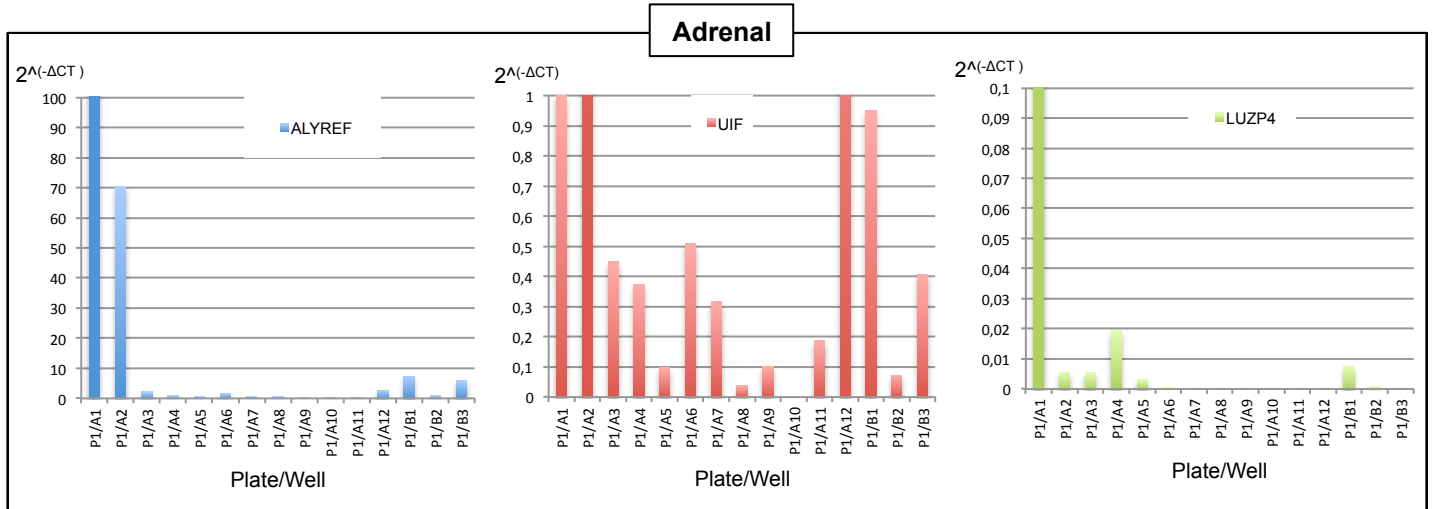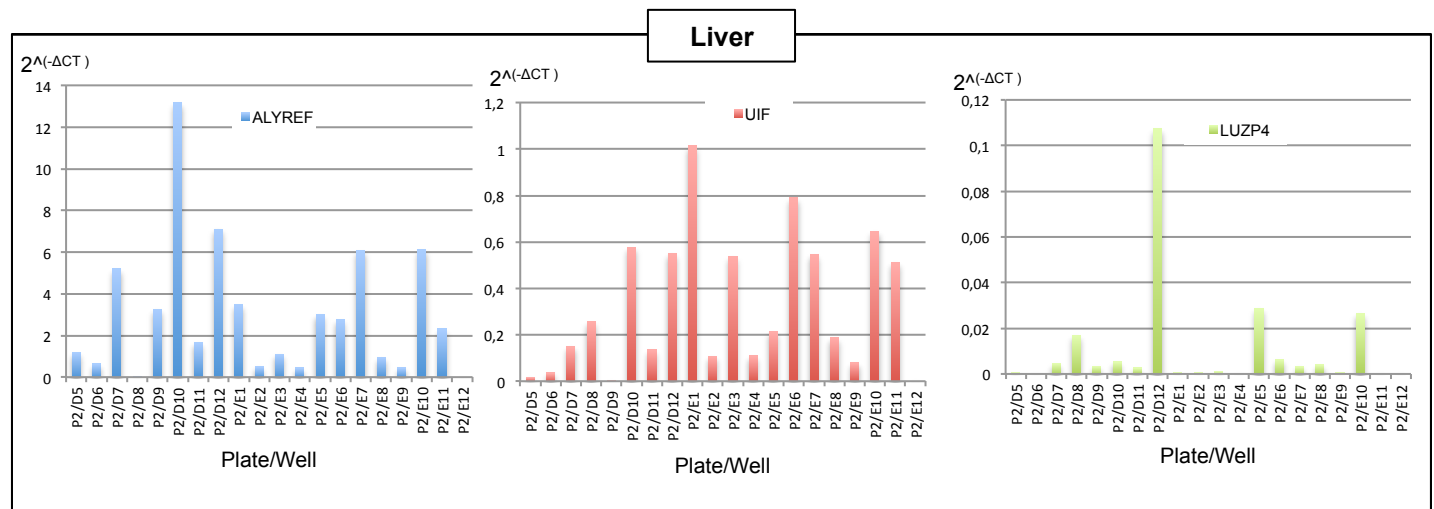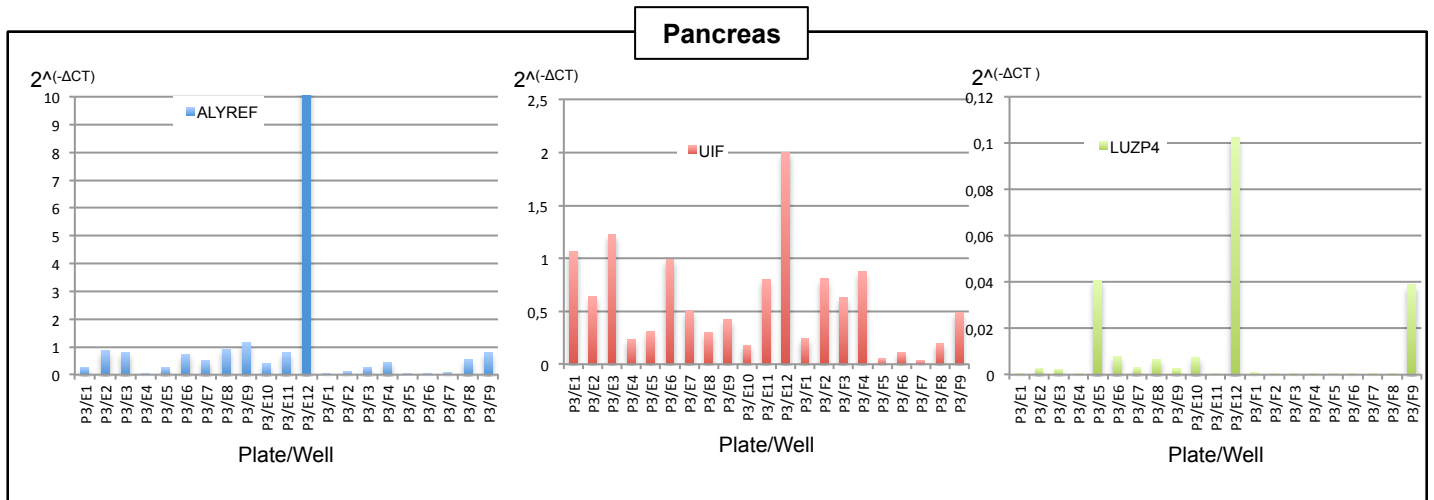

### Cervical

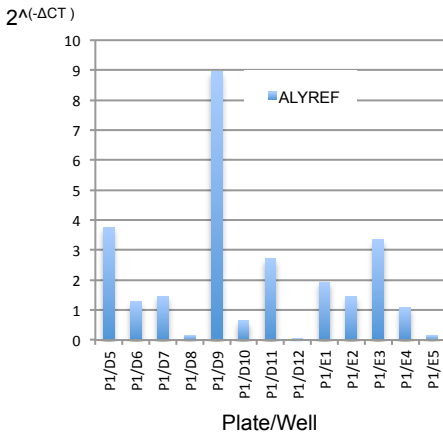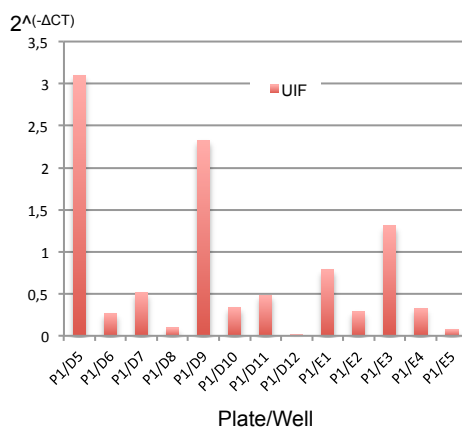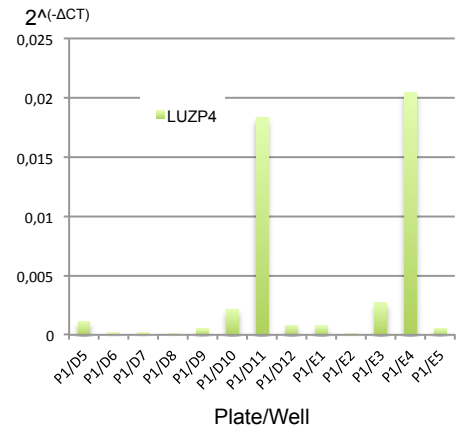

### Colon

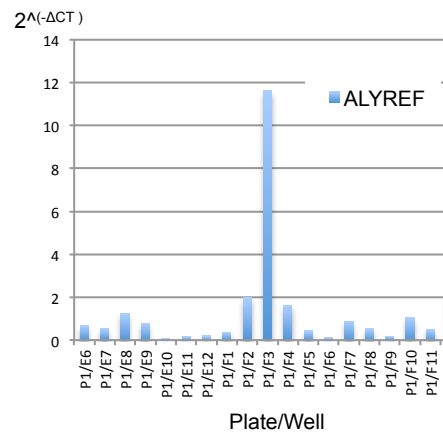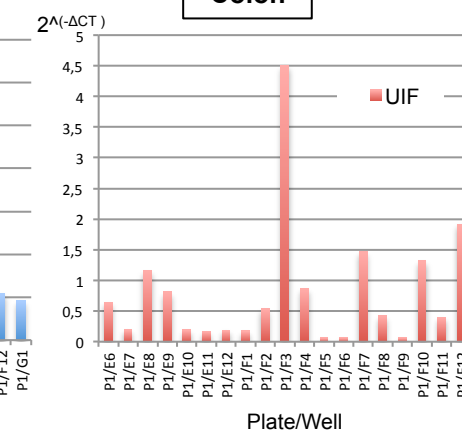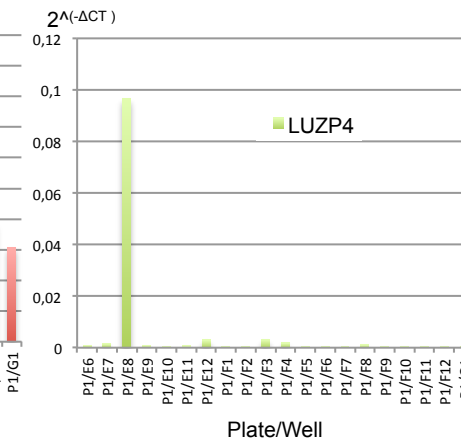

### Endometrial

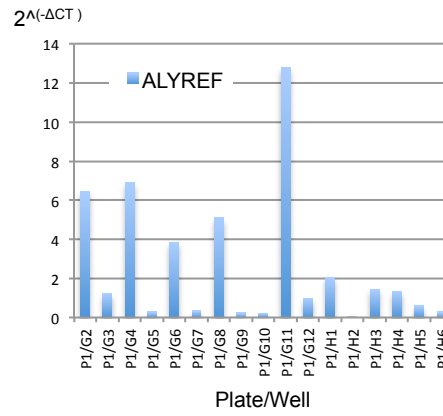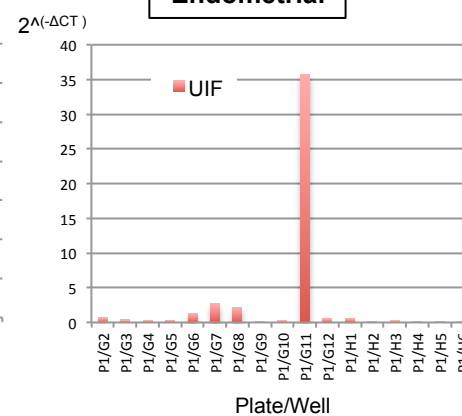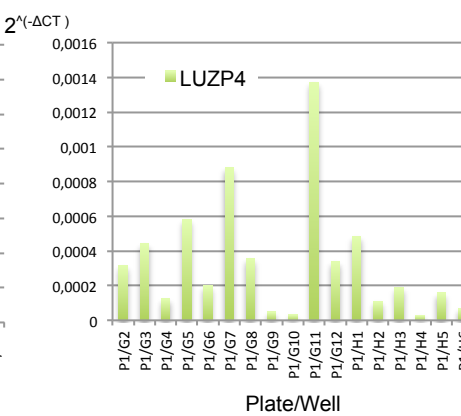

### Oesophagus

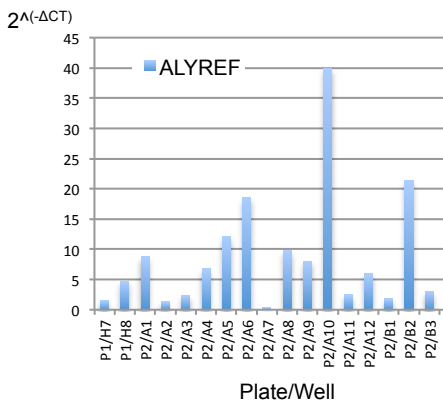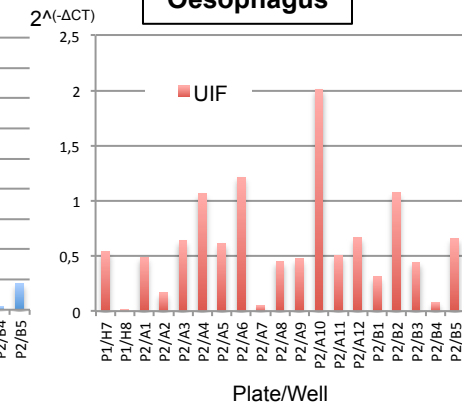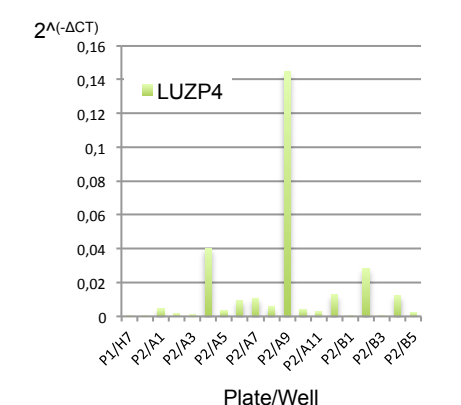

### Breast

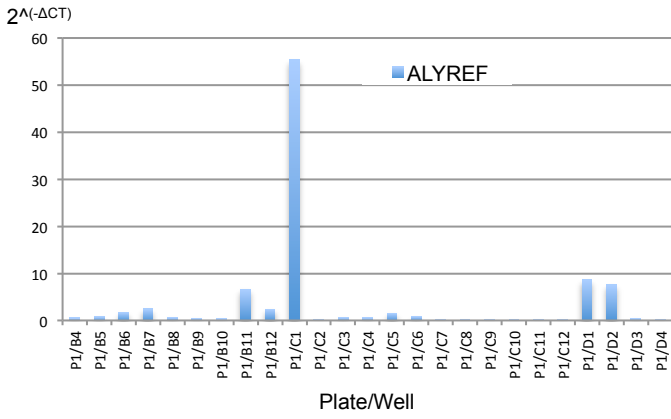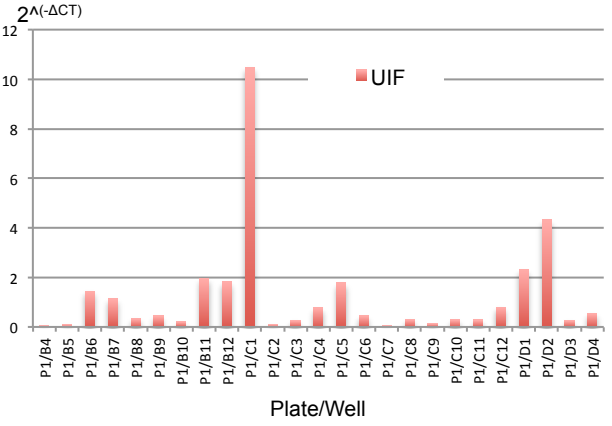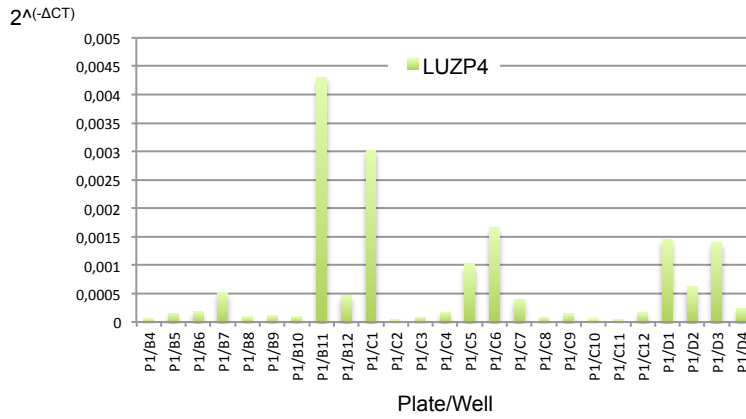

### Kidney

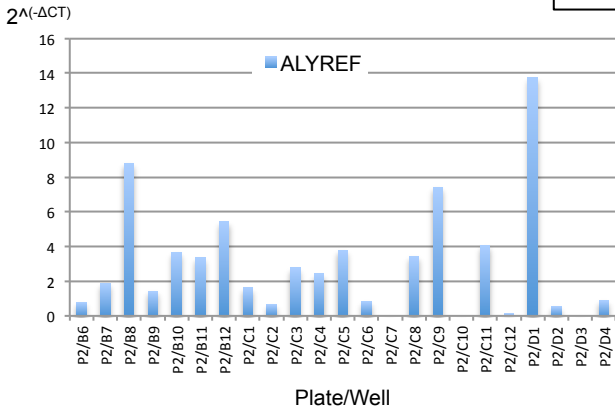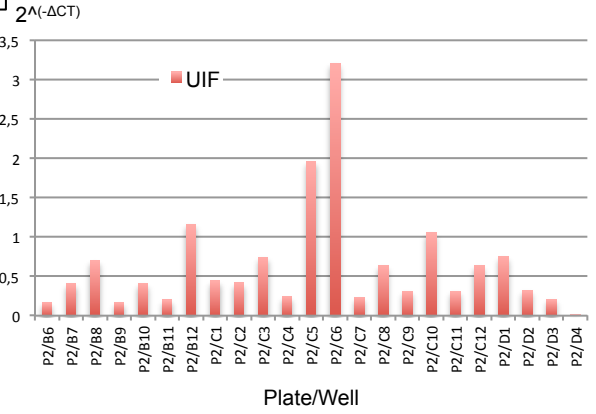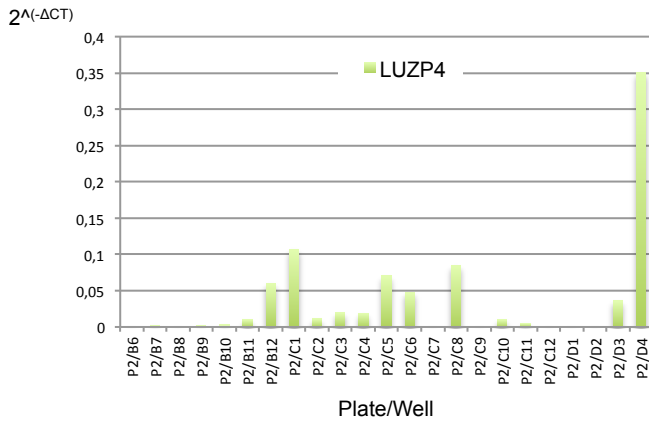

## Ovarian

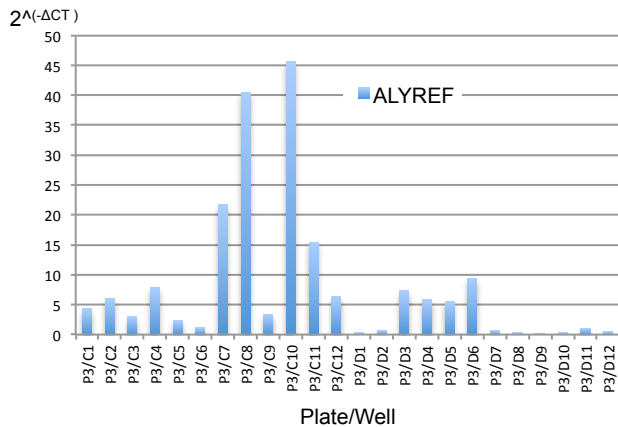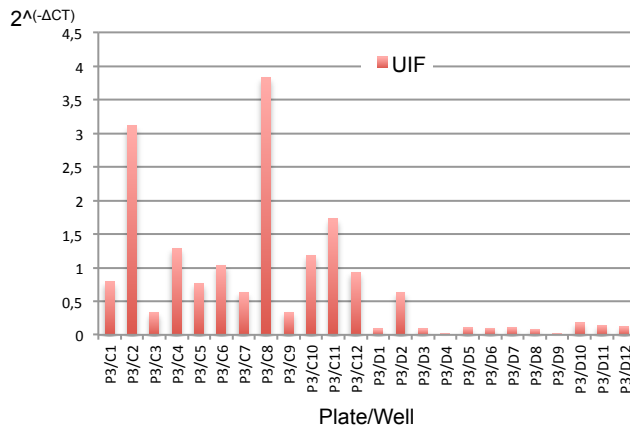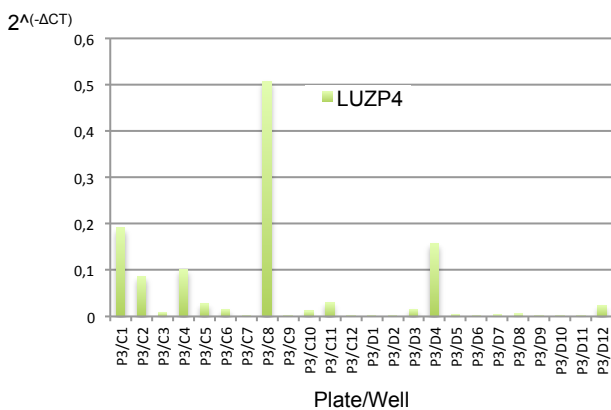

## Lung

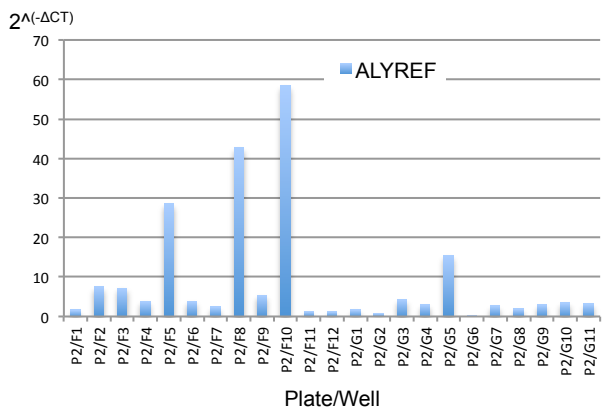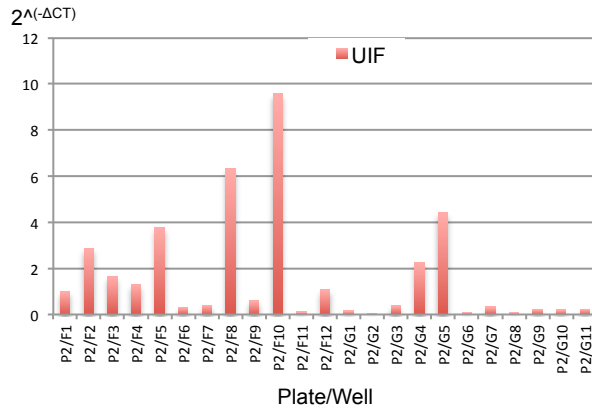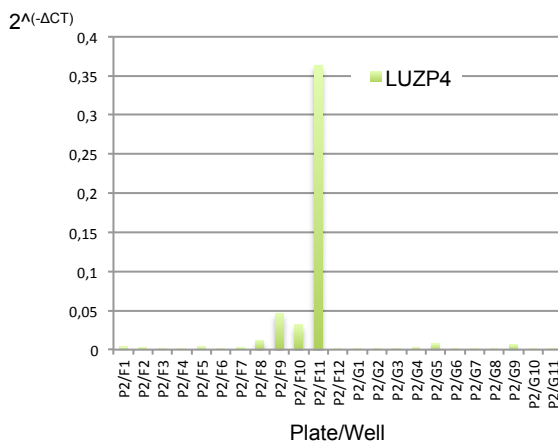



### Lymph Nodes

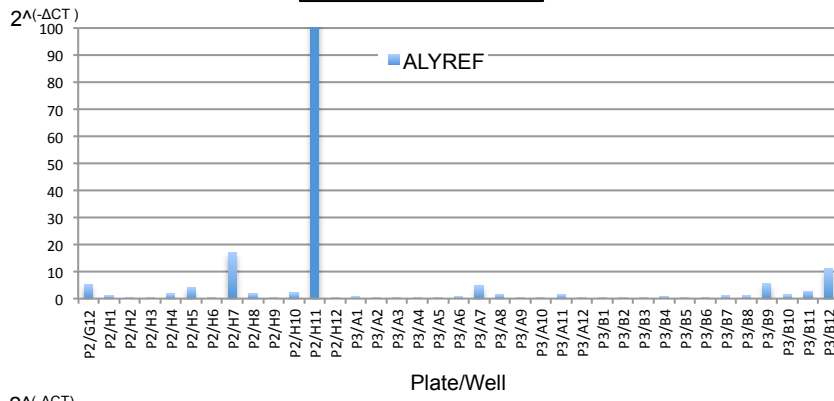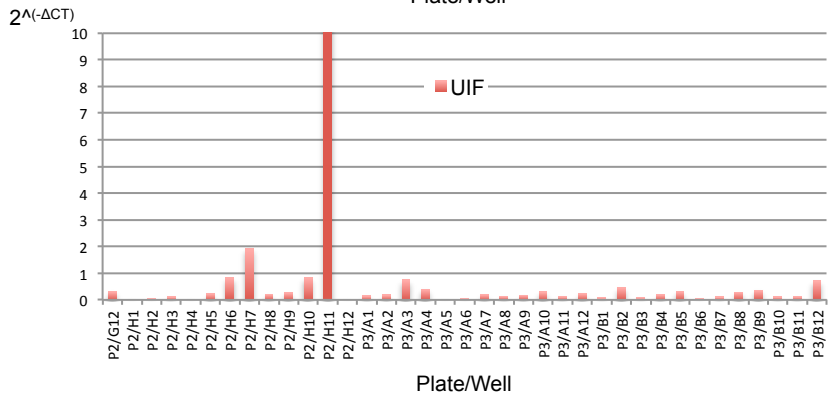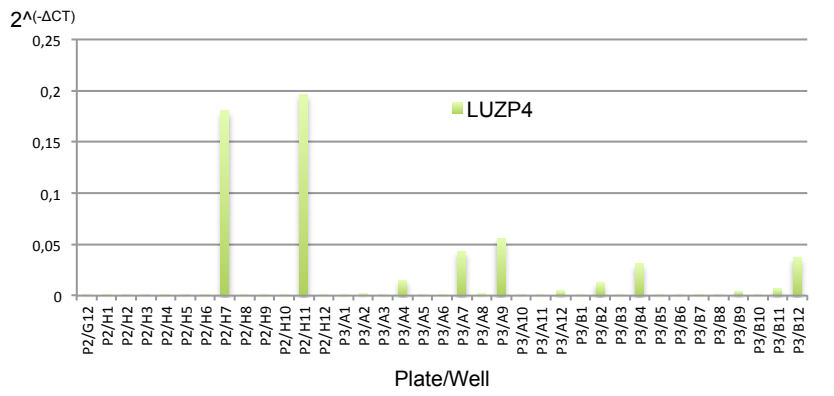

### Urinary Bladder

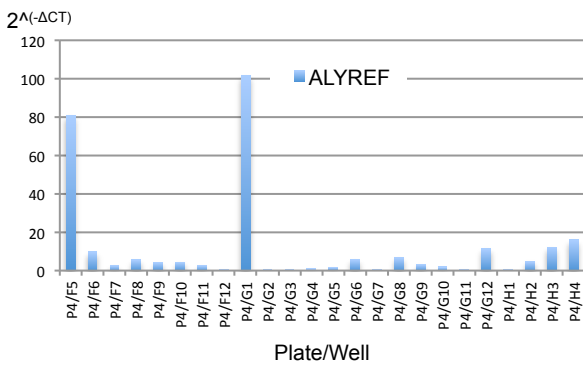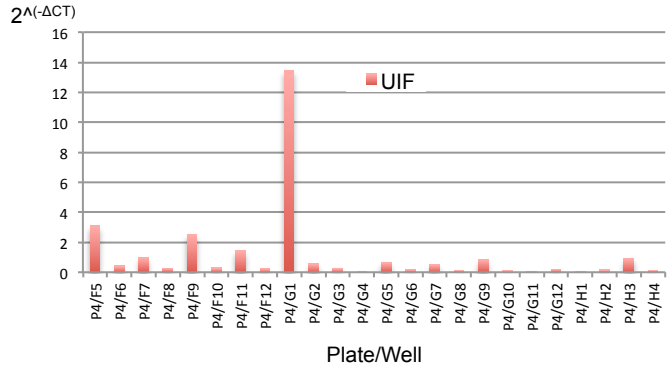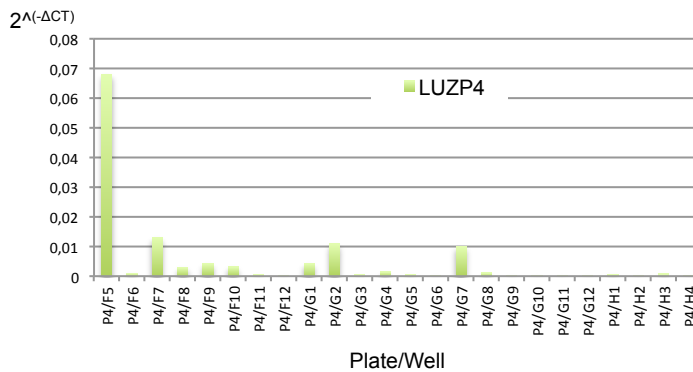

### Stomach

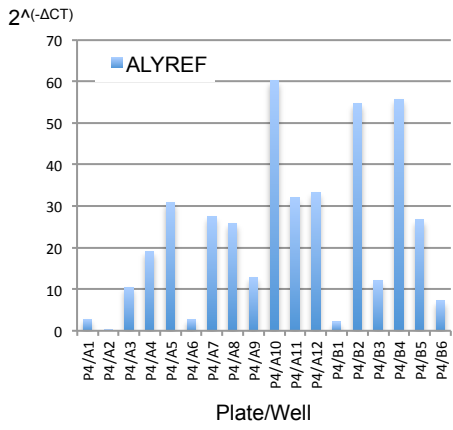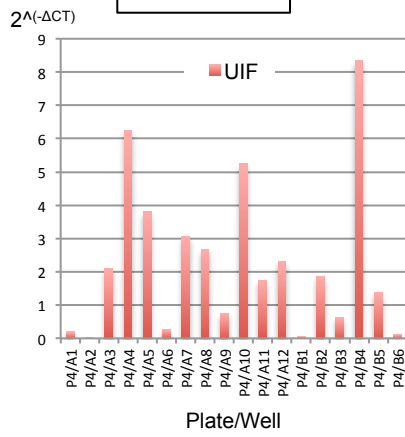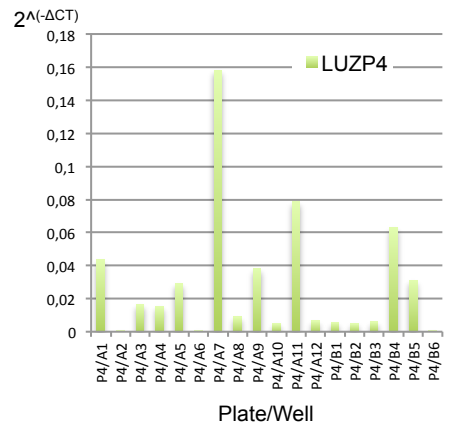

### Thyroid

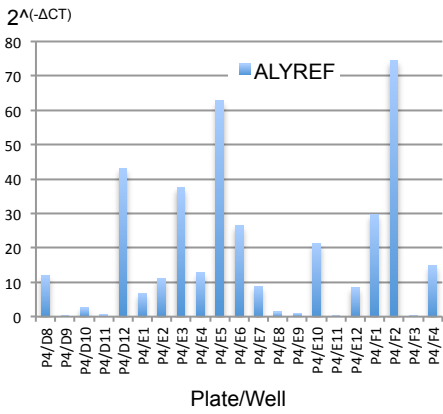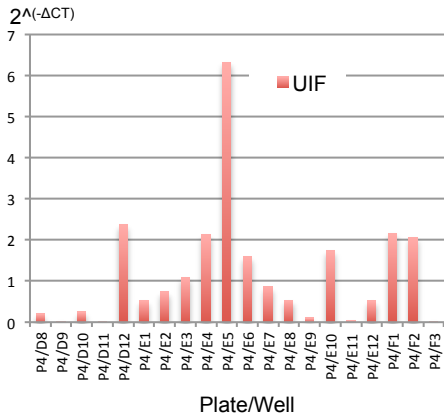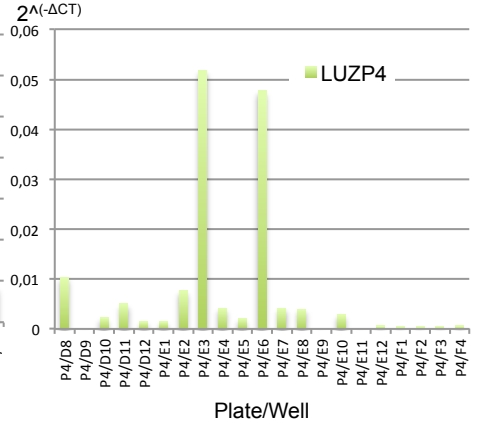

### Uterus

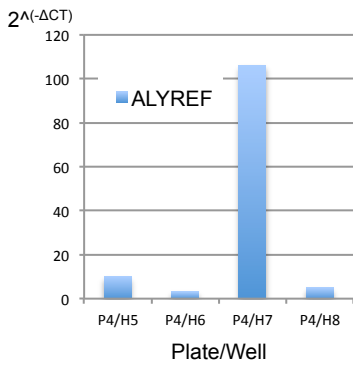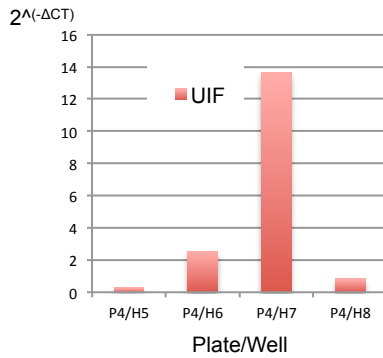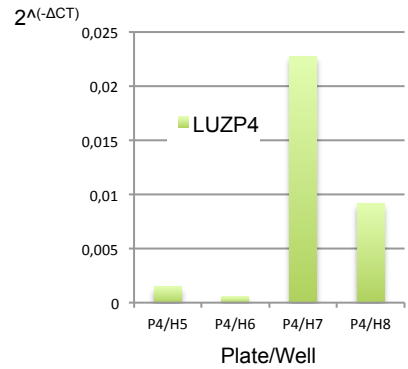

### Prostate

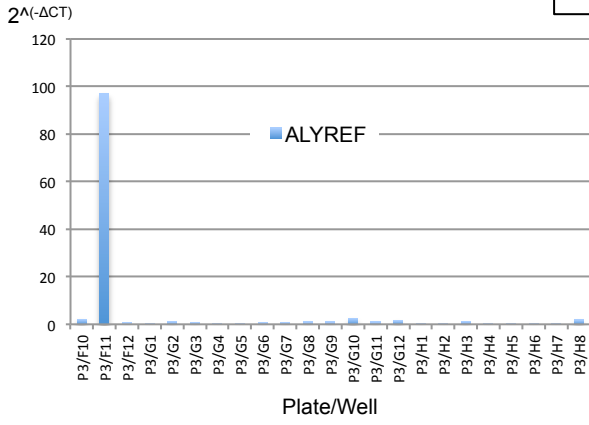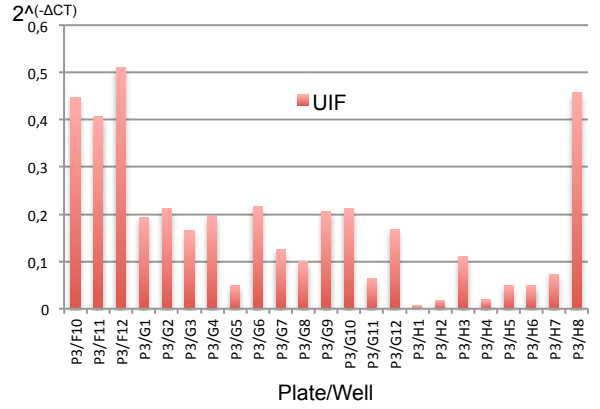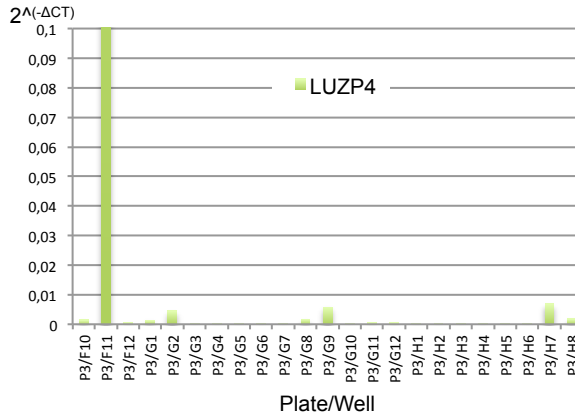

### Skin

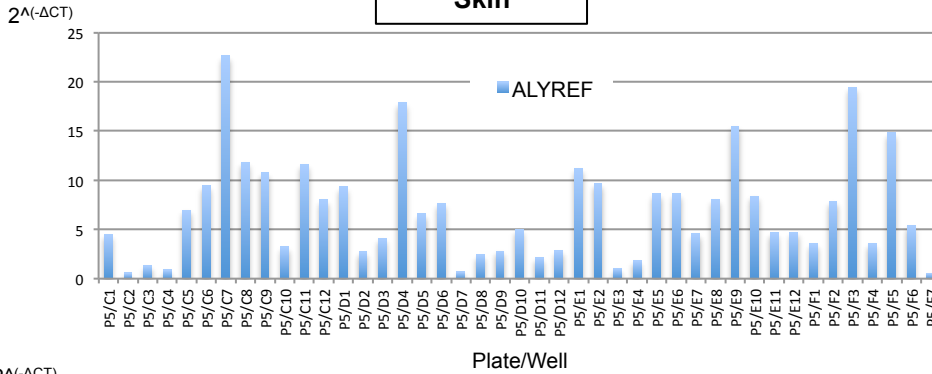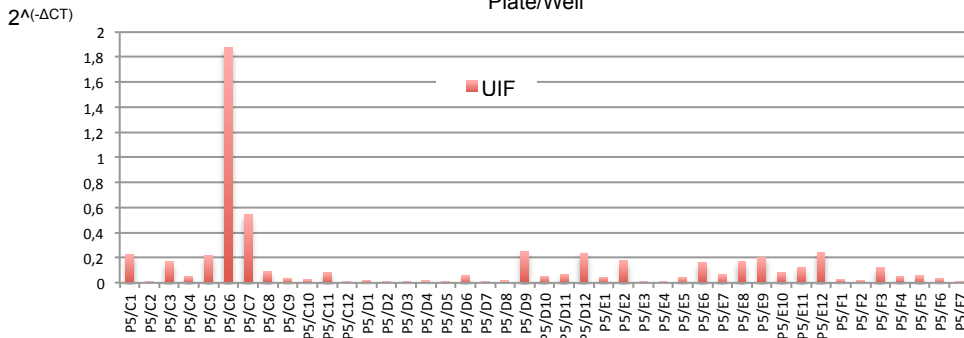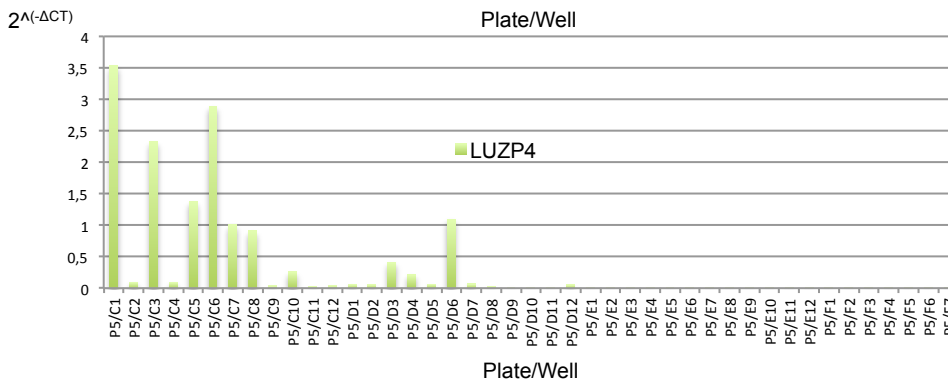

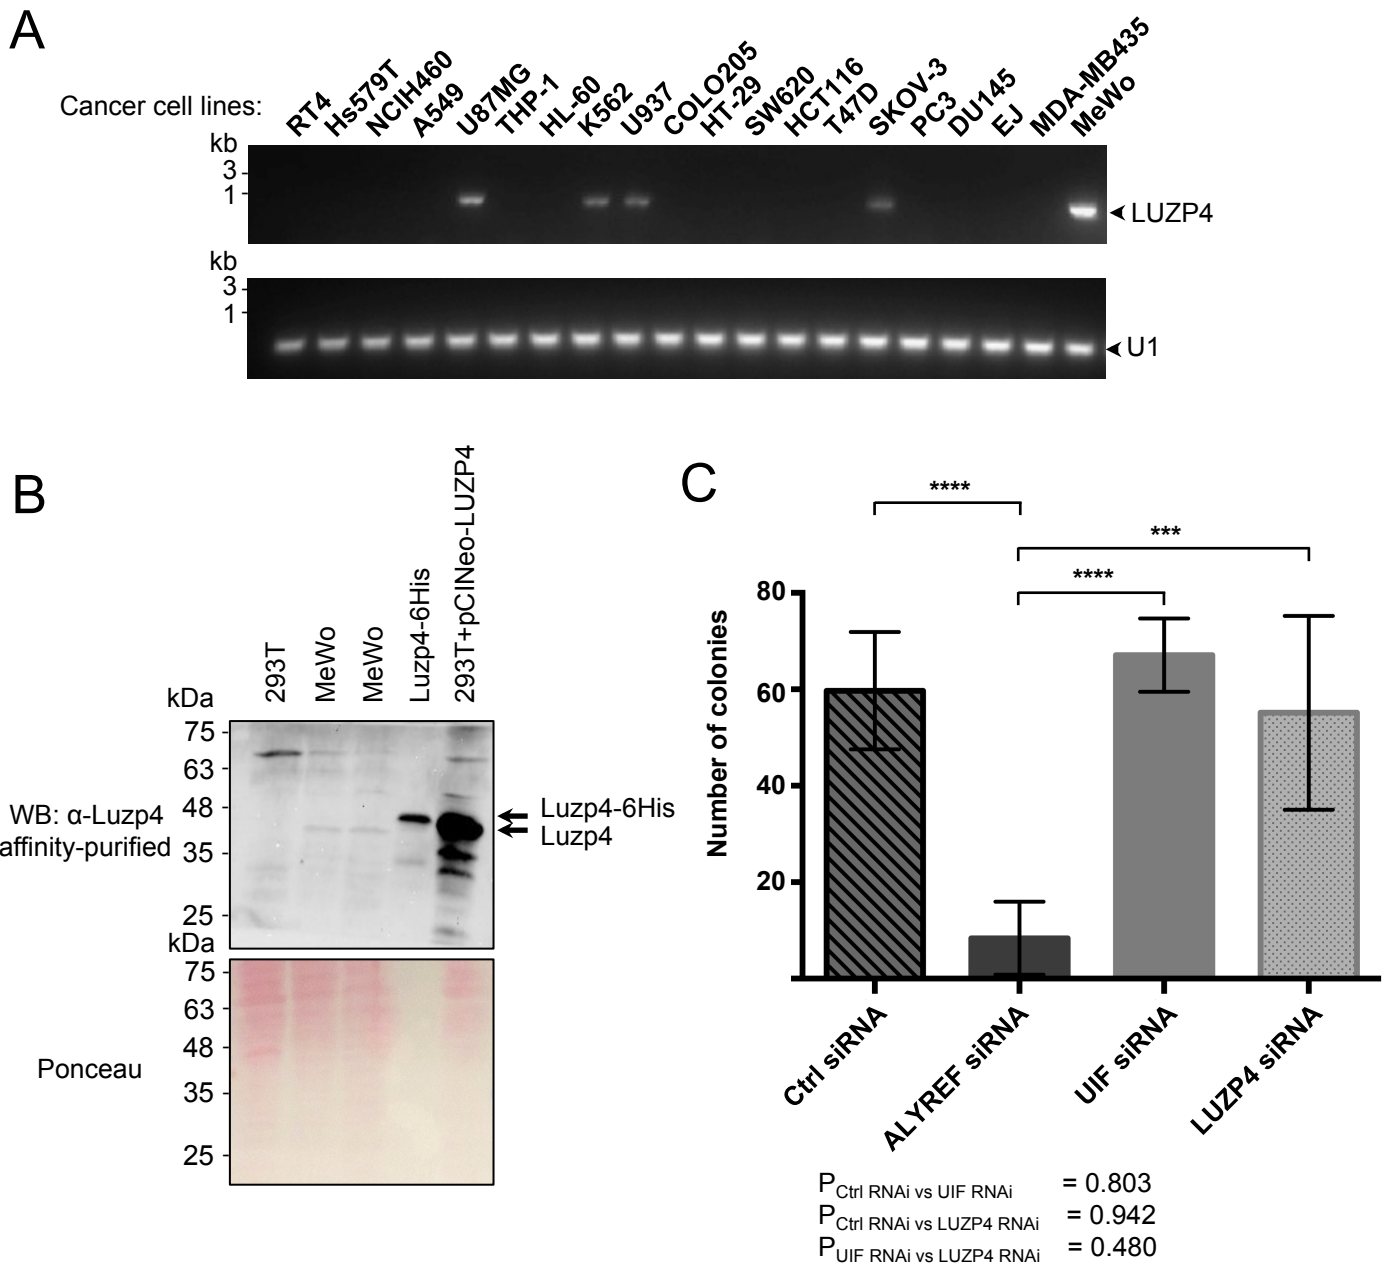

### Supplementary Figure S8.

**(A)** Expression of Luzp4 in cancer cell lines. Various cancer cell lines were screened by non-saturating RT-PCR for LUZP4 expression and analysed by agarose gel electrophoresis. U1 RT-PCR was used to confirm efficient cDNA synthesis in each sample. LUZP4 RT-PCR primers were: forward 5'-GGAGAGGCTACTCAAGATGCAGAAGC-3' and reverse 5'-GAGATCACTCTGAGTGTCCACAAGATCTCC-3'. U1 RT-PCR primers were: forward 5'-ACCTGGCAGGGGAGATACCA-3' and reverse 5'-GGGGAAAGCGCGAACGCAGT-3'. **(B)** Western blot using our best anti-Luzp4 antibody, affinity purified, which recognizes recombinant or transfected Luzp4, but doesn't detect any endogenous Luzp4. 40  $\mu$ g of cell extracts and 20 ng of recombinant Luzp4-6His. Affinity-purified anti-Luzp4 used at 1:500. **(C)** LUZP4 RNAi has no effect on 293T cells proliferation. Colony formation assays performed on 293T cells treated with the indicated siRNAs. Colonies that were scored contained >50 cells; mean values for five independent experiments are shown and error bars represent the standard deviation. Related to Fig.6D. \*:  $P < 0.05$ . \*\*:  $P < 0.01$ . \*\*\*:  $P < 0.001$ . \*\*\*\*:  $P < 0.0001$ .

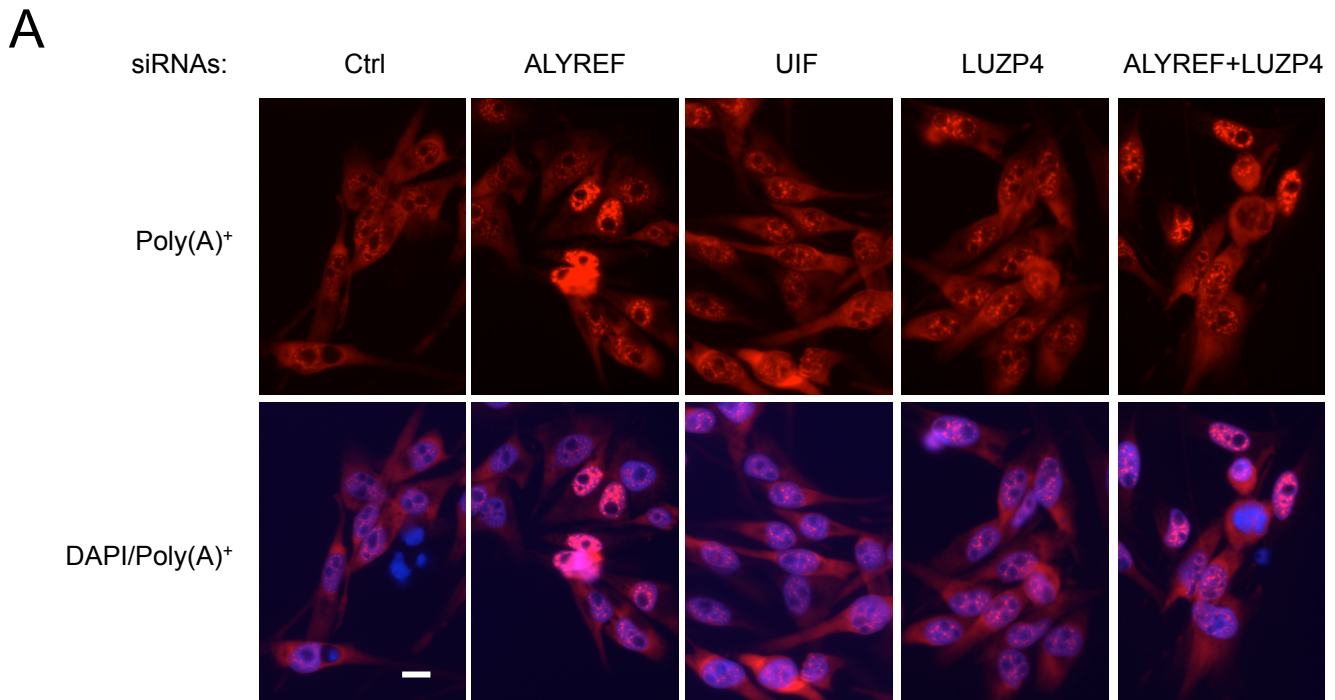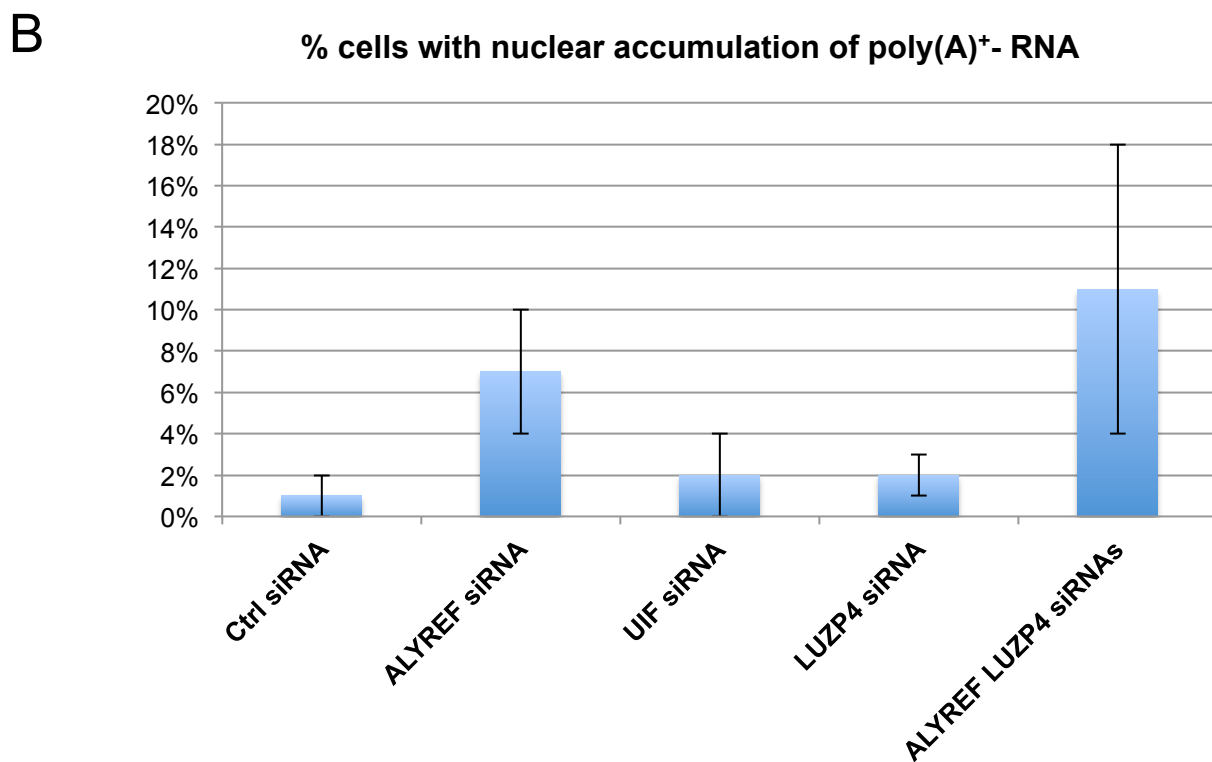

**Supplementary Figure S9.**

**(A)** Cy3-labeled oligo-(dT)<sub>50</sub> FISH was used to assess the localization of poly(A)<sup>+</sup>-RNAs in MeWo cells treated with various siRNAs (top panels). An overlay of DAPI stained cells and the poly(A)<sup>+</sup> signal is shown in the bottom panels. Cells were siRNA-treated twice over a period of 72 hours. All equivalent panels are shown at the same exposure. The scale bar corresponds to 10 μm.

**(B)** Quantification for the results presented in panel A. Four images (with at least 60 cells each) per condition were used to count the proportion of cells displaying a nuclear accumulation of poly(A)<sup>+</sup> RNAs. Error bars represent the standard deviation.
